# Supplementary material for: Molecular Cloning and Functional Characterization of Three 5-HT Receptor Genes (HTR1B, HTR1E, and HTR1F) in Chickens
Source: MDPI journal article supplement (doi:10.3390/genes12060891), 2021-06-09
Supplement: s1 [file s1]

# **Molecular Cloning and Functional Characterization of Three 5-HT Receptor Genes (HTR1B, HTR1E, and HTR1F) in Chickens**

Caiyun Sun, Yang Qiu, Qin Ren, Xiao Zhang, Baolong Cao, Yi Zou, Juan Li, Jiannan Zhang\* and Yajun Wang

## Supplementary Materials

**Table S1. Primers used in this study.**

| Gene                                                     | Primer name | Primer sequences (5'-3')   |
|----------------------------------------------------------|-------------|----------------------------|
| <i><sup>a</sup>Primer for cloning the coding regions</i> |             |                            |
| <i>cHTRIB</i>                                            | U1          | CGGAATTCATGGAGCCGGCGAGCCCC |
|                                                          | L1          | GCTCTAGATCAGCCTGTGCAGCGGAA |
| <i>cHTR1E</i>                                            | U1          | GGGGTACCATGTGCATCCTGGAGGGG |
|                                                          | L1          | GCTCTAGATTAAGTATGTTCTCTACA |
| <i>cHTR1F</i>                                            | U1          | CGGAATTCAACATGGATTTAATAAAC |
|                                                          | L1          | GCTCTAGACTCTTAAAGATATTGCCT |
| <i><sup>a</sup>Primer for quantitative RT-PCR assays</i> |             |                            |
| <i>cHTRIB</i>                                            | U1          | GGGGAAAAGACTGACTCGGG       |
|                                                          | L1          | GTCTTTGTCGCTTTCCGCTC       |
| <i>cHTR1E</i>                                            | U1          | AGCAAGTGACCACCTTTGGG       |
|                                                          | L1          | AAGTAGCTGCTTTGGGTAGCA      |
| <i>cHTR1F</i>                                            | U1          | CACGTCACATTCGCTCCTCT       |
|                                                          | L1          | GTCCCTTCCTTTGCTACCCCG      |
| <i>cPRL</i>                                              | U1          | CCATTCTCTGGAAGGCTGTAGA     |
|                                                          | L1          | CTGGAGTCCTCATCAGCGAGTT     |
| <i>β-actin</i>                                           | U1          | CCCAGACATCAGGGTGTGATG      |
|                                                          | L1          | GTTGGTGACAATACCGTGTTCAT    |

**Table S2. Lists of genes and their GenBank accession numbers used in amino acid sequence alignment.**

|       | Chicken        | Zebra finch    | Duck           | <i>Xenopus tropicalis</i> | Mouse       | Human       |
|-------|----------------|----------------|----------------|---------------------------|-------------|-------------|
| HTR1B | XP_015140120.1 | XP_002190169.2 | XP_005017926.2 | XP_002936251.2            | NP_034612.1 | NP_000854.1 |
| HTR1E | MK139005       | XP_032603125.1 | XP_005013102.1 | XP_002933964.1            | -           | NP_000856.1 |
| HTR1F | MK139006       | XP_002191608.1 | XP_005017708.2 | XP_002931817.1            | NP_032336.1 | NP_000857.1 |

**Table S3. Lists of genes and their GenBank accession numbers used to generate the phylogenetic tree in this study.**

| Gene names | Species                   | GenBank accession numbers |
|------------|---------------------------|---------------------------|
| HTR1B      | Chicken                   | XP_015140120.1            |
|            | Turkey                    | XP_010725582.1            |
|            | Duck                      | XP_005017926.2            |
|            | Zebra finch               | XP_002190169.2            |
|            | Lizard                    | XP_034966577.1            |
|            | Pig                       | NP_999463.1               |
|            | Human                     | NP_000854.1               |
|            | Monkey                    | XP_008004603.1            |
|            | Mouse                     | NP_034612.1               |
|            | Rat                       | NP_071561.1               |
|            | <i>Xenopus tropicalis</i> | XP_002936251.2            |
| HTR1E      | Coelacanth                | XP_006012936.1            |
|            | Chicken                   | MK139005                  |
|            | Turkey                    | XP_019468658.1            |
|            | Duck                      | XP_005013102.1            |
|            | Zebra finch               | XP_032603125.1            |
|            | Lizard                    | XP_034965333.1            |
|            | Pig                       | XP_013848119.2            |
|            | Human                     | NP_000856.1               |
|            | Monkey                    | XP_008004718.1            |
|            | <i>Xenopus tropicalis</i> | XP_002933964.1            |
|            | Coelacanth                | XP_006009258.1            |
| HTR1F      | Chicken                   | MK139006                  |
|            | Turkey                    | XP_003202888.1            |
|            | Duck                      | XP_005017708.2            |
|            | Zebra finch               | XP_002191608.1            |
|            | Lizard                    | XP_034971820.1            |
|            | Pig                       | NP_999266.1               |
|            | Human                     | NP_000857.1               |
|            | Monkey                    | XP_037859109.1            |
|            | Mouse                     | NP_032336.1               |
|            | Rat                       | NP_068629.2               |
|            | <i>Xenopus tropicalis</i> | XP_002931817.1            |
|            | Coelacanth                | XP_006011232.1            |
